RESEARCH ARTICLE

# Synthesis of Triazole Schiff's Base Derivatives and Their Inhibitory Kinetics on Tyrosinase Activity

Feng Yu<sup>1</sup>, Yu-Long Jia<sup>1</sup>, Hui-Fang Wang<sup>1</sup>, Jing Zheng<sup>1</sup>, Yi Cui<sup>1</sup>, Xin-Yu Fang<sup>1</sup>, Lin-Min Zhang<sup>1</sup>, Qing-Xi Chen<sup>1,2\*</sup>

**1** State Key Laboratory of Cellular Stress Biology, Key Laboratory of the Ministry of Education for Coastal and Wetland Ecosystems, School of Life Sciences, Xiamen University, Xiamen, 361005, China, **2** Key Laboratory for Chemical Biology of Fujian Province, Xiamen University, Xiamen, 361005, China

These authors contributed equally to this work.

\* [chenqx@xmu.edu.cn](mailto:chenqx@xmu.edu.cn)

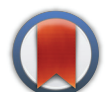

CrossMark  
click for updates

## OPEN ACCESS

**Citation:** Yu F, Jia Y-L, Wang H-F, Zheng J, Cui Y, Fang X-Y, et al. (2015) Synthesis of Triazole Schiff's Base Derivatives and Their Inhibitory Kinetics on Tyrosinase Activity. PLoS ONE 10(9): e0138578. doi:10.1371/journal.pone.0138578

**Editor:** A Ganesan, University of East Anglia, UNITED KINGDOM

**Received:** May 27, 2015

**Accepted:** September 1, 2015

**Published:** September 30, 2015

**Copyright:** © 2015 Yu et al. This is an open access article distributed under the terms of the [Creative Commons Attribution License](https://creativecommons.org/licenses/by/4.0/), which permits unrestricted use, distribution, and reproduction in any medium, provided the original author and source are credited.

**Data Availability Statement:** All relevant data are within the paper and its Supporting Information files.

**Funding:** This work was supported by the Natural Science Foundation of China, grant no. 31271952 and 31371857 (<http://www.nsf.gov.cn/>), the Fundamental Research Funds for the Central Universities, grant no. 20720140541 (<http://www.moe.gov.cn/>) and the National Science Foundation for Fostering Talents in Basic Research of the National Natural Science Foundation of China, grant no. J1310027 (<http://www.nsf.gov.cn/>).

## Abstract

In the present study, new Schiff's base derivatives: (Z)-4-amino-5-(2-(3-fluorobenzylidene)hydrazinyl)-4H-1,2,4-triazole-3-thiol ( $Y_1$ ), (Z)-3-((2-(4-amino-5-mercapto-4H-1,2,4-triazol-3-yl)hydrazono)methyl)phenol ( $Y_2$ ), (Z)-2-((2-(4-amino-5-mercapto-4H-1,2,4-triazol-3-yl)hydrazono)methyl)phenol ( $Y_3$ ) and 3-((Z)-2-(4-(((E)-3-hydroxybenzylidene)amino)-5-mercapto-4H-1,2,4-triazol-3-yl)hydrazono)methyl)phenol ( $Y_4$ ) were synthesized and their structures were characterized by LC-MS, IR and <sup>1</sup>H NMR. The inhibitory effects of these compounds on tyrosinase activities were evaluated. Compounds  $Y_1$ ,  $Y_2$  and  $Y_3$  showed potent inhibitory effects with respective IC<sub>50</sub> value of 12.5, 7.0 and 1.5 μM on the diphenolase activities. Moreover, the inhibition mechanisms were determined to be reversible and mixed types. Interactions of the compounds with tyrosinase were further analyzed by fluorescence quenching, copper interaction, and molecular simulation assays. The results together with the anti-tyrosinase activities data indicated that substitution on the second position of benzene ring showed superior anti-tyrosinase activities than that on third position, and that hydroxyl substitutes were better than fluorine substitutes. In addition, two benzene rings connecting to the triazole ring would produce larger steric hindrance, and affect the bonding between tyrosinase and inhibitors to decrease the inhibitory effects. The anti-tyrosinase effects of these compounds were in contrast to their antioxidant activities. In summary, this research will contribute to the development and design of antityrosinase agents.

## Introduction

Melanin existed in bacteria, fungi, plants and keratinocytes of skin and hair of animals, catalyzed by tyrosinase, made the surface coloring, which played an important role in protecting the skin and eye from ultraviolet radiation and preventing overheating of internal organization

**Competing Interests:** The authors have declared that no competing interests exist.

[1,2]. But overexpression of epidermal pigmentation may lead to some dermatological disorders, such as melasma, freckles, and senile lentiginos [3].

Tyrosinase, a kind of multifunctional enzyme, mainly contributes to the melanin biosynthesis [4]. The enzyme could catalyze two distinct reactions involving the hydroxylation of monophenols and oxidation of diphenols to quinones [5]. The quinones could polymerize spontaneously to form macromolecular dark pigments or aggregate with amino acids and proteins to increase brown color of the pigment [6,7]. In addition, tyrosinase is involved in the process of insect molting, and fresh-keeping of fruits and vegetables [8–10]. In recent years, studies of tyrosinase mainly focus on pigment obstructive disease, melanoma, albino, early onset alzheimer's disease [11]. Therefore, it is of pressing need to acquire new tyrosinase inhibitors from different sources. Hydroquinone, kojic acid, azelaic acid, and arbutin as tyrosinase inhibitors have been applied in pharmaceuticals and cosmetics [12–15]. However, hydroquinone is prohibited for its irritation, mutagenesis and cytotoxic effects [16,17]. The use of kojic acid and arbutin are also limited because of their low efficacy in vivo, unsatisfactory formulation stability, and poor skin penetration [18]. Safe and efficient tyrosinase inhibitors will provide theoretical basis for the treatment of pigment disorders and enrich whitening cosmetics markets [19,20]. Mushroom tyrosinase as a mature model has been widely used in estimating of potential antityrosinase agents [21].

The copper ions in the active center of tyrosinase were the central part of catalytic activities of tyrosinase and it were found in the enzyme from different species [22,23]. So synthesis and screening of antityrosinase agents with copper chelating ability have become current research focus [24,25]. Heterocyclic compounds containing triazole ring have extensive biological activities such as antibacterial, antispasmodic, anti-inflammatory, especially a large number of derivatives have been synthesized as antibacterial drugs [26,27]. Because N and S atoms of the compounds played a key role in the coordination of metals at the active site of metalloprotein [28], they may have the ability to chelate the copper ions in active center of tyrosinase. So 1,2,4-triazole was widely used as mother nucleus to synthesize a series of special biological molecules, but few applications in the synthesis of tyrosinase inhibitor were reported. The structure of hydroxyl group on the benzene ring is similar to the enzyme substrate which can competitively inhibit the activity of enzyme. Therefore, using 4-Amino-3-hydrazino-5-mercapto-1,2,4-triazole (AHMZ, CAS No.1750-12-5, the  $IC_{50}$  is 32.5  $\mu$ M), a derivative of triazole, and benzaldehyde as potential moiety to make up a series of new Schiff's base molecules and explore their antityrosinase activities is the aims of our current work. The results could provide references for developing tyrosinase inhibitor as addition agent for use in fields of whitening cosmetics or fruit and vegetable preservation.

## Materials and Methods

### Materials

The tyrosinase, from mushroom, was bought from Sigma Chemical Co. (St. Louis, MO, USA) and the activity was 6680 U/mg. 4-Amino-3-hydrazino-5-mercapto-1,2,4-triazole, 3-hydroxy benzaldehyde, 2-hydroxy benzaldehyde and 3-fluorobenzene formaldehyde were obtained from Aladdin Industrial Co. (Shanghai, China). Other reagents were all analytical grade.

### Synthesis

Schiff's base derivatives  $Y_1$ ,  $Y_2$ ,  $Y_3$  and  $Y_4$  have been synthesized by reactions between 4-Amino-3-hydrazino-5-mercapto-1,2,4-triazole and benzaldehyde derivatives in ethanol under reflux [29]. The products were filtrated and washed several times with ethanol and dried by suction filter. The synthetic procedures were described in Fig 1.

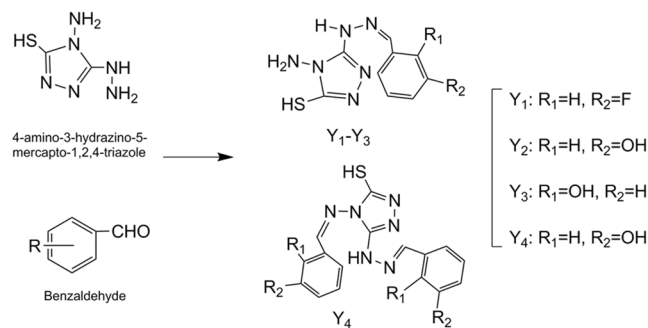

**Fig 1. Synthetic processes of compound Y<sub>1</sub>, Y<sub>2</sub>, Y<sub>3</sub> and Y<sub>4</sub>.**

doi:10.1371/journal.pone.0138578.g001

The structures of compounds Y<sub>1</sub> to Y<sub>4</sub> were verified by <sup>1</sup>H NMR, IR and MS. The mass spectroscopy of compounds showed molecular ions peak [M+H]<sup>+</sup>.

## Enzyme assay

L-Tyr and L-DOPA were used as the substrate to test the monophenolase and diphenolase activities of tyrosinase, respectively [30]. The reaction system (3 ml) contained 1.1 mM L-Tyr or 0.5 mM L-DOPA, 25 mM PBS buffer (pH 6.8) and different concentrations of the inhibitors [31]. For monophenolase and diphenolase activities, the final concentration of tyrosinase was 33.3 μg/ml and 6 μg/ml, respectively. The increased optical density with the oxidation of the substrates at 475 nm (the absorption coefficient was 3700 M<sup>-1</sup>cm<sup>-1</sup>) within a certain time were measured by DU800 spectrophotometer [32]. IC<sub>50</sub> was defined as the concentration of inhibitor inhibited 50% of the enzyme activity, which directly reflects the effect of the inhibitors. The Michaelis-Menten constant K<sub>m</sub> of tyrosinase was determined by Lineweaver-Burk plot with different concentrations of L-DOPA as substrate and the inhibition constants K<sub>i</sub> and K<sub>iS</sub> were determined by the secondary plots of the apparent K<sub>m</sub>/V<sub>m</sub> or 1/V<sub>m</sub> versus the concentration of the inhibitors [33]. The inhibition mechanism was reflected by the plots of 1/v versus 1/[S] with various concentrations of mushroom tyrosinase [34].

## Fluorescence quenching experiments

Fluorescence quenching means the decrease of fluorescence intensity between the fluorescent molecules and solute molecules. This method was usually used to study the interaction between conformation of protein molecules and small molecules [35]. Cary Eclipse fluorescence spectrophotometer was used to record the fluorescence intensities with an excitation wavelength of 280 nm and emission slit widths of 5 nm [33]. Y<sub>1</sub>, Y<sub>2</sub> and Y<sub>3</sub> do not have fluorescence phenomenon at the excitation wavelength. In this study, the inhibitor was added in 0.3 mg/ml tyrosinase solution to detect the fluorescence intensity changes and the final concentrations of inhibitor range from 10 to 70 μM.

## Copper interaction

The method to study the relationship between the copper ions and the compounds was similar to that described by Xiao-Xin Chen et al with slight modification [36, 37]. The reaction media include 0.5 mM PBS buffer, 33.3 μM inhibitor solutions and different concentrations of Cu<sup>2+</sup>. The DU800 spectrophotometer was used to record the spectra ranged from 300 nm to 450 nm 30 seconds after the addition of CuSO<sub>4</sub>.

## Antioxidant assay

ABTS free-radical scavenging assay was used to test the antioxidant capacity of compounds  $Y_1$  to  $Y_4$ . The method can be found in many articles [38, 39]. 7 mM ABTS and 2.45 mM ammonium persulfate were blended and stored in a dark place 16 hours, and then diluted by 80% ethanol to obtain the working solution which gave an absorbance of 0.69 at 734 nm. The working solution and compounds were mixed and allowed to react for ten minutes, and then measured the absorbance at 734 nm ( $A_1$ ) was measured using spectrophotometer. L-ascorbic acid and 80% ethanol was used as a positive and blank control, respectively. The  $A_0$  value was the blank absorbance. The antioxidant rate (%) =  $(A_0 - A_1)/A_0 * 100\%$

## Molecular docking

The molecular docking technique allows better understanding of the potency of all compounds as inhibitors and the structure and activity relationship. We proceeded to examine the interactions of tyrosinase and compound  $Y_1$ ,  $Y_2$  and  $Y_3$ . In this study, ChemDraw software was used to display the molecular models of the compounds and tyrosinase-inhibitors docking were demonstrated by molecular operation environment software (MOE). The polyphenol oxidase 3 (ppo3, PDB code: 2Y9W) without the structure of the exogenous protein, the PEG and water molecules was used as the protein model [40,41]. The bonding site of the enzyme in hydrophobic pocket nearby the copper ions was screened by software for the highest score. Before docking, the structure of tyrosinase molecule and ligand were energy minimized by MOE software.

## Results

### IR, $^1\text{H}$ NMR and mass spectrometry

The products were white powders and dissolved in DMSO or water with alkali promoting. The followings were the data of IR,  $^1\text{H}$  NMR and LC-MS spectra of the compounds.

(Z)-4-amino-5-(2-(3-fluorobenzylidene)hydrazinyl)-4H-1,2,4-triazole-3-thiol ( $Y_1$ ): IR (S1 Fig) (KBr,  $\nu_{\text{max}}$ ,  $\text{cm}^{-1}$ ) 3289, 3269(-NH<sub>2</sub>), 3197(-NH), 1648(C = N)  $^1\text{H}$  NMR (S2 Fig) (600 MHz, DMSO-d<sub>6</sub>)  $\delta$  10.84 (s, 1H), 8.32 (d, J = 2.3 Hz, 1H), 7.51–7.38 (m, 3H), 7.24–7.07 (m, 1H), 5.53 (d, J = 2.0 Hz, 2H), 5.28 (d, J = 2.1 Hz, 1H); LC-MS (m/z) (S3 Fig): observed, 253.35 [M+H]<sup>+</sup>; calculated, 252.27 [M]<sup>+</sup>.

(Z)-3-((2-(4-amino-5-mercapto-4H-1,2,4-triazol-3-yl)hydrazono)methyl)phenol ( $Y_2$ ): IR (S4 Fig) (KBr,  $\nu_{\text{max}}$ ,  $\text{cm}^{-1}$ ) 3351(-OH), 3244, 3200(-NH<sub>2</sub>), 3153(-NH), 1651(C = N)  $^1\text{H}$  NMR (S5 Fig) (600 MHz, DMSO-d<sub>6</sub>)  $\delta$  12.94 (s, 1H), 10.60 (s, 1H), 9.53 (s, 1H), 8.23 (s, 1H), 7.21 (t, J = 7.8 Hz, 1H), 7.09 (t, J = 1.9 Hz, 1H), 6.99 (dt, J = 7.6, 1.2 Hz, 1H), 6.77 (ddd, J = 8.1, 2.6, 1.0 Hz, 1H), 5.50 (s, 2H); LC-MS (m/z) (S6 Fig): observed, 251.33 [M+H]<sup>+</sup>; calculated, 250.28 [M]<sup>+</sup>.

(Z)-2-((2-(4-amino-5-mercapto-4H-1,2,4-triazol-3-yl)hydrazono)methyl)phenol ( $Y_3$ ): IR (S7 Fig) (KBr,  $\nu_{\text{max}}$ ,  $\text{cm}^{-1}$ ) 3448(-OH), 3283, 3247(-NH<sub>2</sub>), 3176(-NH), 1646(C = N)  $^1\text{H}$  NMR (S8 Fig) (600 MHz, DMSO-d<sub>6</sub>)  $\delta$  13.01 (s, 1H), 11.00 (s, 1H), 10.91 (s, 1H), 8.50 (d, J = 2.1 Hz, 1H), 7.48–7.37 (m, 1H), 7.24 (t, J = 7.7 Hz, 1H), 6.95–6.84 (m, 2H), 5.54 (d, J = 2.1 Hz, 2H); LC-MS (m/z) (S9 Fig): observed, 251.33 [M+H]<sup>+</sup>; calculated, 250.28 [M]<sup>+</sup>.

3-((Z)-2-(4-((E)-3-hydroxybenzylidene)amino)-5-mercapto-4H-1,2,4-triazol-3-yl)hydrazono)methyl)phenol ( $Y_4$ ): IR (S10 Fig) (KBr,  $\nu_{\text{max}}$ ,  $\text{cm}^{-1}$ ) 3375(-OH), 3187, 3110(-NH<sub>2</sub>), 3020(-NH), 1637(C = N)  $^1\text{H}$  NMR (S11 Fig) (600 MHz, DMSO-d<sub>6</sub>)  $\delta$  10.68 (s, 1H), 9.98 (s, 1H), 9.84 (s, 1H), 9.57 (s, 1H), 8.25 (s, 1H), 7.45–7.28 (m, 3H), 7.22 (t, J = 7.8 Hz, 1H), 7.13 (t, J = 1.9 Hz, 1H), 7.03 (dt, J = 7.8, 1.7 Hz, 2H), 6.84–6.74 (m, 1H); LC-MS (m/z) (S12 Fig): observed, 355.42 [M+H]<sup>+</sup>; calculated, 354.39 [M]<sup>+</sup>.

## Effects of the compounds on mushroom tyrosinase

L-DOPA as the diphenolase substrate of tyrosinase was used to screen the compounds with good antityrosinase activity. The results showed that compounds  $Y_1$  to  $Y_3$  had good inhibitory activity on diphenolase [Fig 2D](#). Their  $IC_{50}$  values were determined to be 12.5, 7.0 and 1.5  $\mu\text{M}$ , respectively. However, compound  $Y_4$  almost do not have antityrosinase activity. Then the inhibitory effects of the three compounds on monophenolase activity of tyrosinase were also determined. The results for the oxidation of the L-Tyr were shown in [Fig 2AI, 2BI and 2CI](#), respectively.

In [Fig 2](#), curves 0 to 4 expressed the monophenolase kinetics with different concentrations of inhibitors, and the activities of tyrosinase dropped significantly with the concentrations of the inhibitors increasing. After a certain period of time, the reaction slopes were constant and enzyme catalysis reached steady-state. The different slopes represented the stable activity of monophenolase, which reflected the oxidation rates of L-Tyr. The curves of [Fig 2AII, 2BII and 2CII](#) represented the dynamic trend of the steady-state activity of monophenolase with various concentrations of the inhibitors. The concentration of  $Y_1$ ,  $Y_2$  and  $Y_3$  to decrease half of the steady-state activities of monophenolase was 185, 245 and 95  $\mu\text{M}$ , respectively. The results showed that the inhibitory effects of the compounds on the reaction rates of diphenolase and monophenolase were dose-dependent. A conclusion could be drawn from [Fig 2](#) that inhibitory effects of inhibitors on diphenolase were higher than that of monophenolase inhibition.

## Inhibitory mechanisms, types, and constants of the compounds on mushroom tyrosinase

Under different concentrations of the enzyme, the residual activity of tyrosinase with a fixed amount of substrate was tested. The results were showed in [Fig 3AI, 3BI and 3CI](#). The straight lines 1 to 5 all passed through the origin, which indicated that the inhibitory mechanisms of  $Y_1$ ,  $Y_2$  and  $Y_3$  on tyrosinase activity were reversible.

In order to explore the inhibitory types of the Schiff's bases  $Y_1$  to  $Y_3$ , the concentration of tyrosinase was kept constant and measured the initial reactions velocity ( $v_0$ ) under various concentrations of substrate were measured. A set of straight lines ([Fig 3AII, 3BII and 3CII](#)) of  $1/v_0$  versus  $1/[S]$  all passed through the second quadrant or third quadrant. The results indicated that the inhibitory types between the inhibitors and tyrosinase were of mixed type including competitive, non-competitive and anti-competitive inhibition. The constants  $K_I$ , for the inhibitor bonding with the free enzymes, were shown in [Fig 3AIII, 3BIII and 3CIII](#). Furthermore, the constants  $K_{IS}$ , for the inhibitors bonding with enzyme-substrate complexes, were shown in [Fig 3AIV, 3BIV and 3CIV](#).  $K_I$  and  $K_{IS}$  were acquired from the straight lines of the slopes and vertical intercepts versus the concentrations of inhibitors, respectively.

$K_I$  and  $K_{IS}$  Its values of  $Y_1$ ,  $Y_2$  and  $Y_3$  were determined to be 6.67 and 4  $\mu\text{M}$ , 7.94 and 27.8  $\mu\text{M}$ , 15.47 and 21.04  $\mu\text{M}$ , respectively. The parameters of inhibition were summarized in [Table 1](#).

## Fluorescence quenching

Fluorescence quenching can be divided into static quenching and dynamic quenching. Dynamic quenching is a process, which has energy or electron transfer, while the static quenching process will generate complexes without fluorescence [\[42\]](#). The quenching rate between the fluorescent

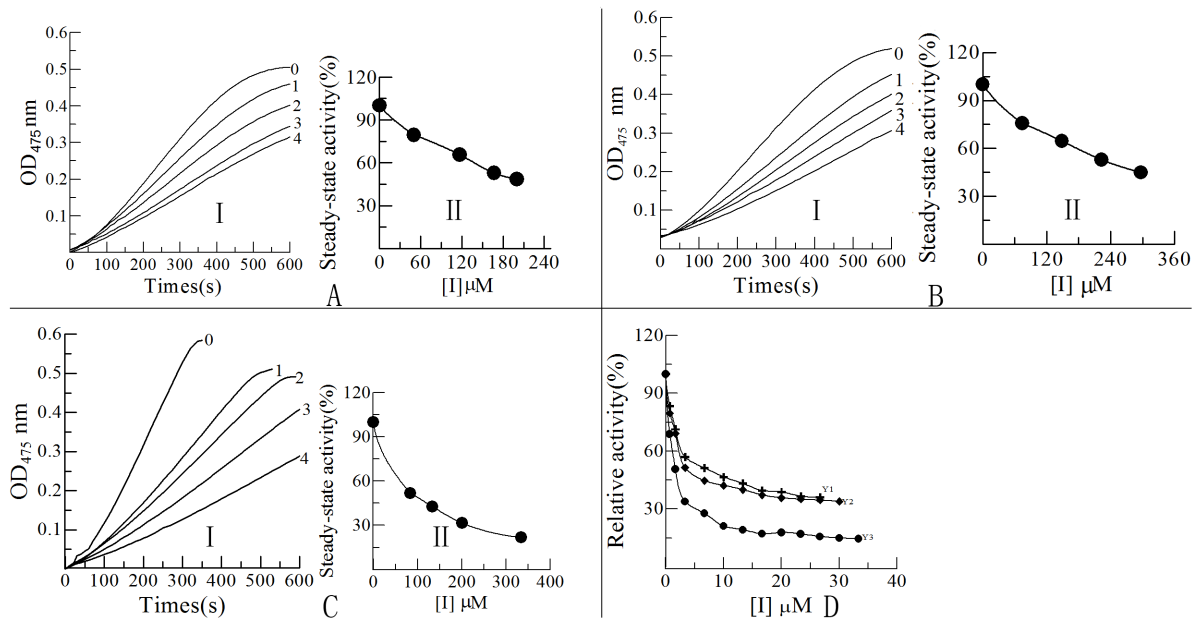

**Fig 2. Determinations of the inhibitory activity on monophenolase and diphenolase.** (I) The inhibitory effects on monophenolase activity of mushroom tyrosinase. (II) The inhibitory effects on steady-state activity of monophenolase. A, B and C represents the compound Y<sub>1</sub>, Y<sub>2</sub> and Y<sub>3</sub> respectively. (D) The inhibitory effects on diphenolase activity of mushroom tyrosinase.

doi:10.1371/journal.pone.0138578.g002

molecules and quenching agents followed the Stern-Volmer curve equation [43]:

$$F_0 / F = 1 + K_{SV} [Q]$$

In the formula,  $F_0$  is the intensity of fluorescence without quenching agent,  $F$  is the fluorescence intensity after adding quencher,  $K_{SV}$  (L/mol) represents the relationship of dynamic equilibrium between biological macromolecules and fluorescence quencher molecules after diffusing and colliding, and  $[Q]$  is the concentration of quencher. From Fig 4D, the  $K_{SV}$  of Y<sub>1</sub>, Y<sub>2</sub> and Y<sub>3</sub> was determined to be 94437, 7160983 and 159186 L/mol, respectively. The rate constants of  $K_{SV} < 100$  L/mol in dynamic quenching process indicated that the quenching process was not controlled by diffusion but perhaps a static quenching process which will have an impact on protein secondary structure and physiological activity.

In addition, the fluorescence intensity decreased and the emission wavelength values slightly increased with the concentration of inhibitors increasing, which further illustrated the generation of complexes between inhibitors and tyrosinase (Fig 4A, 4B and 4C).

## Copper interaction

Tyrosinase has two copper ions in its active center, which catalyzes the adjacent hydroxylation of monophenol into diphenol and then catalyzes the reaction of diphenol into quinones [44]. The whole wavelength scanning experiment detected the bonding ability of the three compounds and copper ions, which was used to infer the intensity of the inhibitors to combine with tyrosinase and reveal inhibitory mechanisms. The results were shown in Fig 5.

As observed in Fig 5a, 5b and 5c, a new absorption peak was generated at about 380 nm in Fig 5c, thus only compound Y<sub>3</sub> could combine with copper ion. A conclusion could be speculated: Y<sub>3</sub> could combine with the copper ions in the active center of tyrosinase and the ability

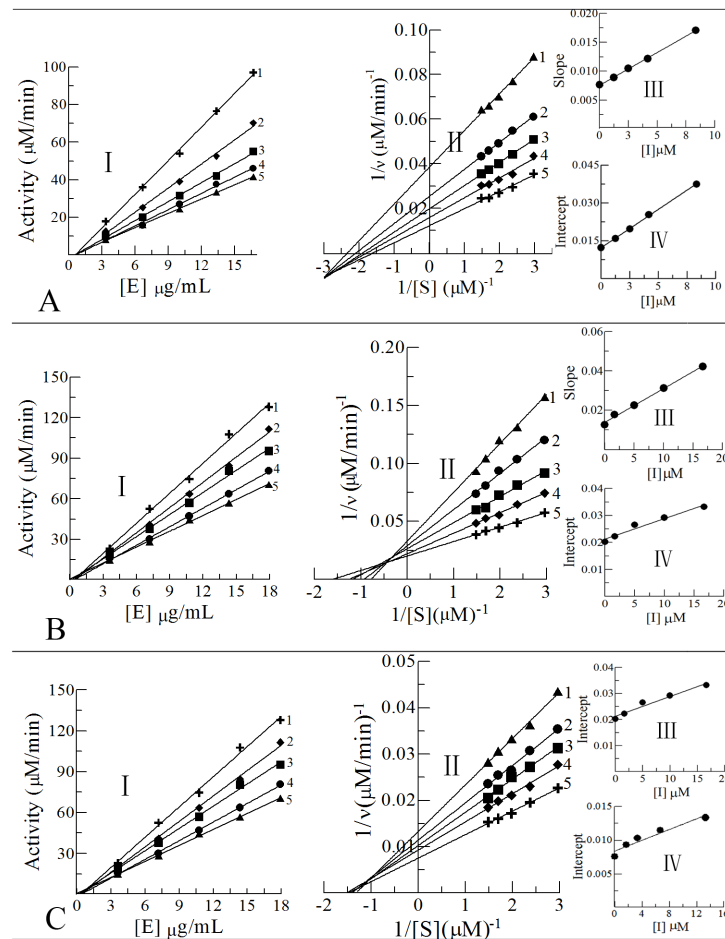

**Fig 3. Determinations of the inhibitory mechanisms, types, and constants on diphenolase.** (I) The inhibitory mechanisms of the compounds  $Y_1$  to  $Y_3$ . (II) Lineweaver-Burk plots for diphenolase activity. (III) The plots of slopes versus the concentrations of the compounds (IV) The plots of intercepts versus the concentrations of the compounds.

doi:10.1371/journal.pone.0138578.g003

of the substituted group to chelate the copper ions was related to its location on the benzene ring. And the hypothesis will be further confirmed by molecular docking analysis.

### Antioxidant assay

Triazole derivatives generally have extensive biological activities, because of its thiol and hydroxyl groups, it may have strong antioxidant activity. With vitamin C (Vc) and AHMZ as

**Table 1. The Inhibition parameters of compounds  $Y_1$ - $Y_3$  on tyrosinase.**

| parameters            | $Y_1$      | $Y_2$      | $Y_3$      |
|-----------------------|------------|------------|------------|
| $IC_{50}(\mu M)$      | 12.5       | 7          | 1.52       |
| $K_i$                 | 6.67       | 7.49       | 15.47      |
| $K_{IS}$              | 4          | 28         | 21.04      |
| Inhibition type       | Mixed      | Mixed      | Mixed      |
| Inhibitory mechanisms | Reversible | Reversible | Reversible |

doi:10.1371/journal.pone.0138578.t001

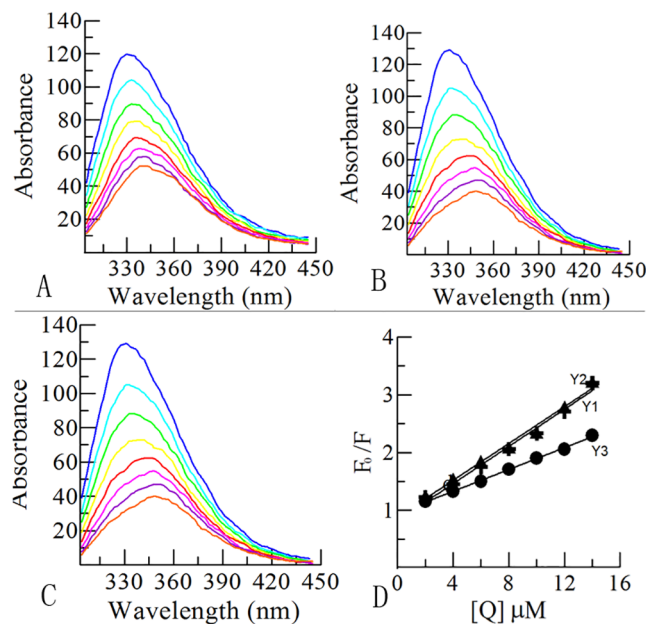

**Fig 4. The fluorescence quenching experiment of compounds.** (A, B, C) Fluorescence absorption phenomena of the compounds. A, B and C represents the compound  $Y_1$ ,  $Y_2$  and  $Y_3$  respectively. (D) The relationship of fluorescence intensity and the concentrations of compounds  $Y_1$ ,  $Y_2$  and  $Y_3$ .

doi:10.1371/journal.pone.0138578.g004

control, the antioxidation abilities of the compounds  $Y_1$  to  $Y_4$  were assayed and the results were shown in Fig 6.

The determination of antioxidant activity achieved the desired results and the properties were dose-dependent. The antioxidant capacities were in the range of  $Y_1 > Y_2 > Y_3 > Y_4 > Vc > AHMZ$ . It can be concluded that the combination of A TMZ and benzaldehyde could improve the antioxidant capacity. This result may be explained by the superimposition effect of reducing groups (hydroxyl, thiol and amino).

### Molecular docking

Molecular simulations further clarified the underlying mechanisms of compounds in the active center, which would give a more convincing conclusion by combining the results of copper ions mutual effect. Fig 7 depicted the docking conformation of the four compounds in the tyrosinase catalytic center.

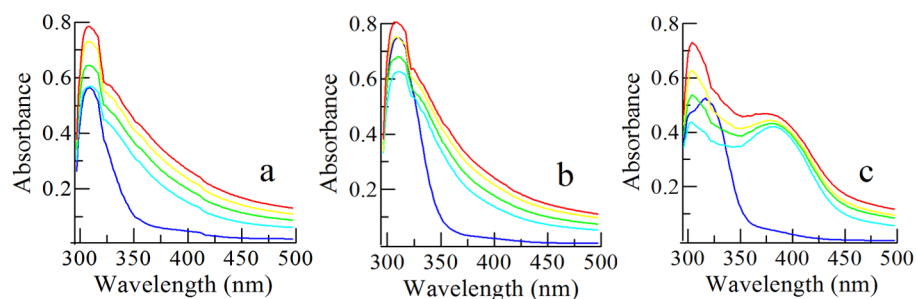

**Fig 5. Absorption spectra for the copper ions interaction with the compounds  $Y_1$ ,  $Y_2$  and  $Y_3$ , respectively.**

doi:10.1371/journal.pone.0138578.g005



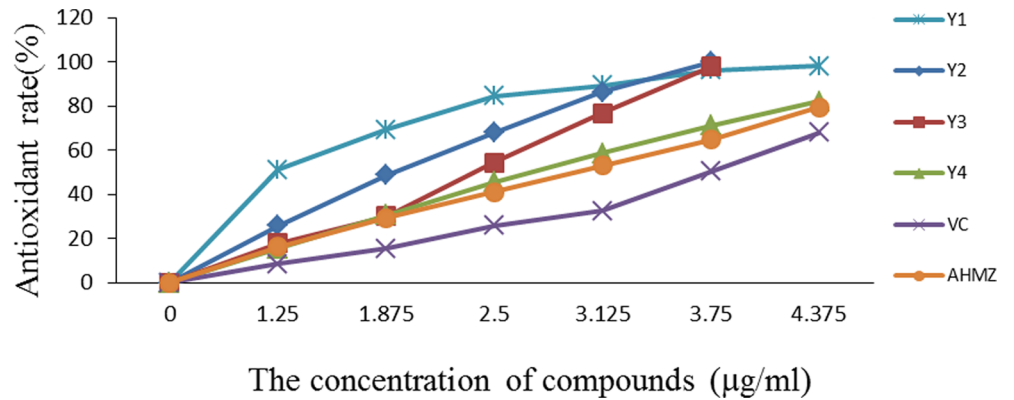

**Fig 6. The antioxidant assays of compounds Y<sub>1</sub> to Y<sub>4</sub>.**

doi:10.1371/journal.pone.0138578.g006

For the substituent on the benzene ring, only the hydroxyl of compound Y<sub>3</sub> could interact with the copper ion in the active center of enzyme. Some atoms on compound Y<sub>1</sub> to Y<sub>3</sub> act as the acceptor or donor generate hydrogen bonds with the center of tyrosinase. Compound Y<sub>1</sub> generated hydrogen bonds with His<sub>244</sub> and Glu<sub>256</sub>, Y<sub>2</sub> with Glu<sub>256</sub>, His<sub>259</sub>, His<sub>85</sub>, His<sub>94</sub>, Y<sub>3</sub> with His<sub>244</sub> and Glu<sub>256</sub>. In addition compound Y<sub>1</sub> could also form interactions with tyrosinase

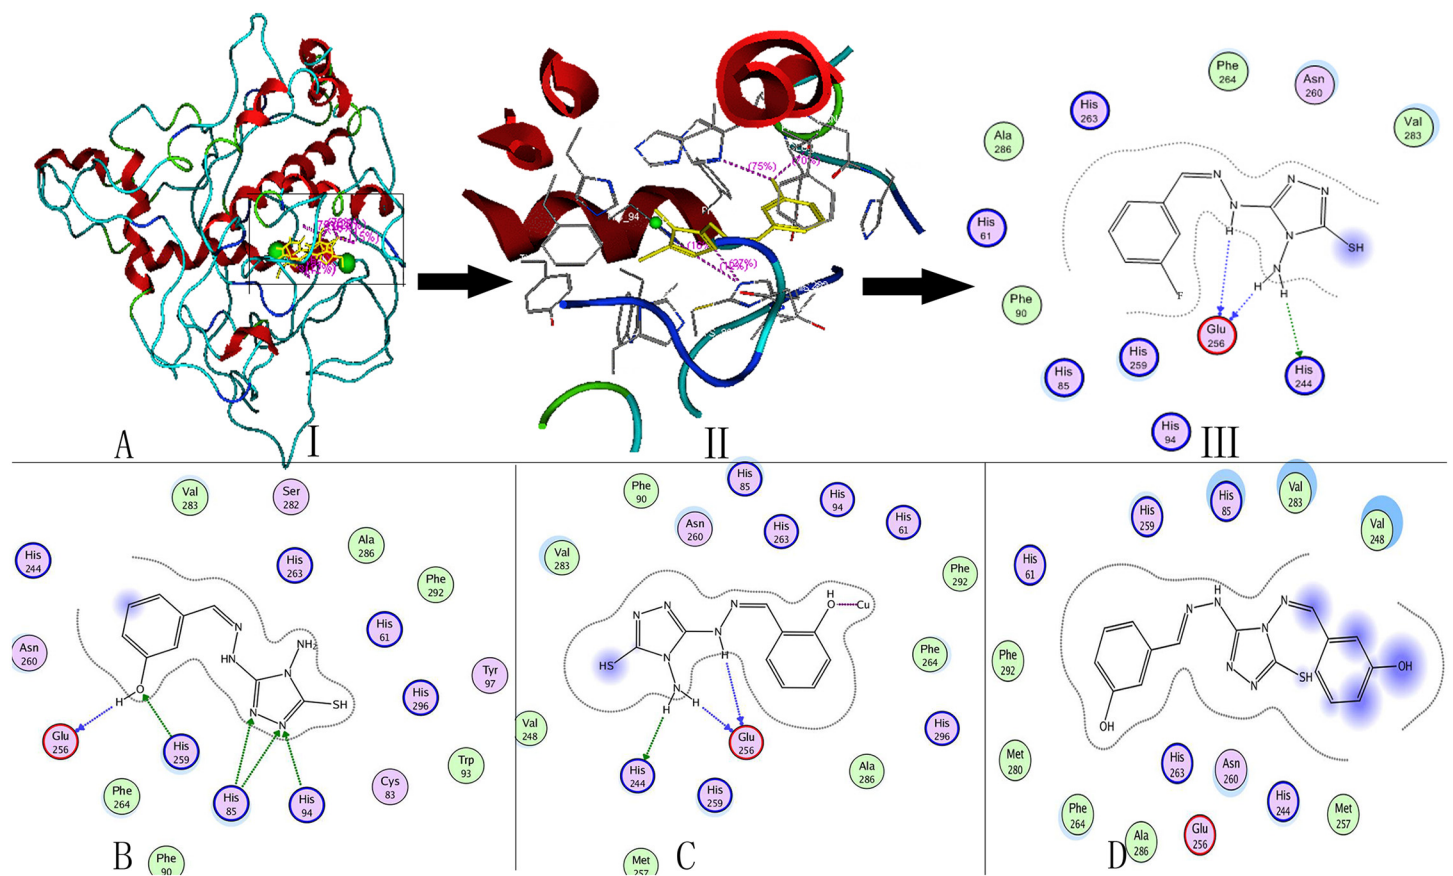

**Fig 7. Docking information of compound Y<sub>1</sub> to Y<sub>4</sub> in the bonding site of tyrosinase. (A)** The molecular docking process of compound Y<sub>1</sub>. (I) The global figure of docking. (II) The enlarged figure of docking center. The inhibitor molecule was shown as yellow, while the copper ion was in green. (III, B, C, D) the interaction between compound Y<sub>1</sub> to Y<sub>4</sub> and the residues of tyrosinase, respectively.

doi:10.1371/journal.pone.0138578.g007

residues: Ala<sub>286</sub>, His<sub>263</sub>, Phe<sub>264</sub>, Asn<sub>260</sub>, Val<sub>283</sub>, His<sub>94</sub>, His<sub>259</sub>, His<sub>85</sub>, Phe<sub>90</sub>, His<sub>61</sub>, which was shown in Fig 7AIII. Compound Y<sub>2</sub> formed interactions with tyrosinase residues: Val<sub>283</sub>, Ser<sub>282</sub>, His<sub>263</sub>, Ala<sub>286</sub>, Phe<sub>292</sub>, His<sub>61</sub>, His<sub>296</sub>, Tyr<sub>97</sub>, Trp<sub>93</sub>, Cys<sub>83</sub>, Phe<sub>90</sub>, Phe<sub>264</sub>, Asn<sub>260</sub>, His<sub>244</sub>, which was shown in Fig 7B. Compound Y<sub>3</sub> form interactions with tyrosinase residues: Val<sub>283</sub>, Phe<sub>90</sub>, Asn<sub>260</sub>, His<sub>85</sub>, His<sub>263</sub>, His<sub>94</sub>, His<sub>61</sub>, Phe<sub>292</sub>, Phe<sub>264</sub>, His<sub>296</sub>, Ala<sub>286</sub>, His<sub>259</sub>, Met<sub>257</sub>, with the result was shown in Fig 7C. Moreover, compound Y<sub>4</sub> could also form interaction with tyrosinase residues: Val<sub>248</sub>, Val<sub>283</sub>, His<sub>85</sub>, His<sub>259</sub>, His<sub>61</sub>, Phe<sub>292</sub>, Met<sub>280</sub>, Phe<sub>264</sub>, Ala<sub>286</sub>, His<sub>263</sub>, Asn<sub>260</sub>, His<sub>244</sub>, Met<sub>257</sub>, Glu<sub>256</sub>, which was shown in Fig 7D.

## Discussion

The methods of decreasing the activity of melanocytes or avoiding UV radiation all could effectively reduce the accumulation of melanin. However, inhibiting the activities of tyrosinase was most effective when the damage has been done [45,46]. For the purpose of acquiring efficient antityrosinase agents, we synthesized 10 compounds and 3 from them were found to exhibit antityrosinase activities. This article reported the synthesis of tyrosinase inhibitors and screening on monophenolase and diphenolase of tyrosinase, tested the inhibitory types, mechanisms, fluorescence quenching, copper ions interaction, molecular simulation to further unravel the mechanisms, and its oxidation resistance as a supplement of biological activity.

Compounds Y<sub>1</sub> to Y<sub>3</sub> have inhibitory effect on monophenolase and diphenolase activities of mushroom tyrosinase, and the inhibition effects on enzyme were dose-dependent. For monophenolase activity, the compounds suppressed the steady-state activities drastically to decrease the process of enzyme catalysis. For the diphenolase activity, reversible inhibition indicated that the inhibitors suppressed tyrosinase not through reducing the number of the dynamic enzymes. The mixed inhibitory types showed that Y<sub>1</sub>, Y<sub>2</sub> and Y<sub>3</sub> suppressed the enzyme activities through bonding with the free enzymes and the enzyme-substrate complexes. Fluorescence quenching results reflected the tyrosinase molecular conformation could be changed by the quencher, which directly showed that tyrosinase could combine with inhibitors to form. The result revealed that the inhibition on tyrosinase did not include the anti-competitive inhibition and the bonding between inhibitors and enzyme may alter the conformations of bonding sites of the substrate to make the bonding difficult or the inhibitor may combine with enzyme-substrate complex and changed the conformation of enzyme to form the inactive inhibitor-enzyme-substrate complexes. Copper ions interaction and molecular docking experiment further exposed the reason of the inhibitory effect on tyrosinase. The inhibition ability of the inhibitors on tyrosinase were closely related to the structures of the inhibitors. From the slight difference of molecular structures in the docking information, the following information could be get: the free amino hydrogen on imidazole ring had the potential ability to inhibit the activity of tyrosinase by forming hydrogen bonds with residues of the enzyme active center. The molecular structures of compounds Y<sub>1</sub> to Y<sub>4</sub> proved that the inhibitory effects of 2-substitutes on the benzene ring were better than 3-substitutes and hydroxyl substitutes were better than that of fluorine substitutes. In addition, two free amino groups on the imidazole ring connected with two benzene rings respectively, the groups would generate greater steric hindrance and affect the bonding between tyrosinase and inhibitors resulting in reduced inhibitory effect. The differences of structure affect the degree of inhibition on the enzyme and the way of interaction with the enzyme which is in agreement with previous reports [47,48].

The antioxidant abilities of the compounds Y<sub>1</sub> to Y<sub>4</sub> as a supplement of biological activity were assayed. Comparing the differences of molecular structures, the position and type of the substituent on the benzene ring affected the antioxidant capacity. The results that fluorine substitutes were superior to hydroxyl substitutes, and that 3-substituted on the benzene ring were better than

2-substitutes were in contrast to their antityrosinase effects. The antioxidant mechanisms of the compounds are different from their antityrosinase mechanisms, which needs further studies.

In summary, three novel compounds were synthesized as antityrosinase agents. Through many primary determinations, the inhibitors showed effective inhibitory effects on mushroom tyrosinase and the inhibition mechanisms were unraveled. Our current work offered some guidance to the design of novel tyrosinase inhibitors. However, further studies are needed to explore their inhibitory effect on excessive synthesis of melanin, their usage in fresh-keeping, or their other biological activities.

## Supporting Information

**S1 Fig. The IR spectrum of Compound Y<sub>1</sub>.**

(TIF)

**S2 Fig. The <sup>1</sup>H NMR spectrum of Compound Y<sub>1</sub>.**

(TIF)

**S3 Fig. The LC-MS spectrum of Compound Y<sub>1</sub>.**

(TIF)

**S4 Fig. The IR spectrum of Compound Y<sub>2</sub>.**

(TIF)

**S5 Fig. The <sup>1</sup>H NMR spectrum of Compound Y<sub>2</sub>.**

(TIF)

**S6 Fig. The LC-MS spectrum of Compound Y<sub>2</sub>.**

(TIF)

**S7 Fig. The IR spectrum of Compound Y<sub>3</sub>.**

(TIF)

**S8 Fig. The <sup>1</sup>H NMR spectrum of Compound Y<sub>3</sub>.**

(TIF)

**S9 Fig. The LC-MS spectrum of Compound Y<sub>3</sub>.**

(TIF)

**S10 Fig. The IR spectrum of Compound Y<sub>4</sub>.**

(TIF)

**S11 Fig. The <sup>1</sup>H NMR spectrum of Compound Y<sub>4</sub>.**

(TIF)

**S12 Fig. The LC-MS spectrum of Compound Y<sub>4</sub>.**

(TIF)

**S13 Fig. The article summary.** Synthesis of triazole schiff's base derivatives and the study of tyrosinase inhibitory mechanism.

(TIF)

## Author Contributions

Conceived and designed the experiments: FY YLJ QXC. Performed the experiments: FY YLJ HFW JZ LMZ. Analyzed the data: FY YC XYF. Contributed reagents/materials/analysis tools: FY YC LMZ XYF. Wrote the paper: FY YLJ HFW QXC.

## References

1. Sanchezferrer A, Rodriguezlopez JN, Garciacanovas F, Garciacarmona F (1995) Tyrosinase—a comprehensive review of its mechanism. *Bba-Protein Struct M* 1247: 1–11.
2. Zimmerman WC, Blanchette RA, Burnes TA, Farrell RL (1995) Melanin and perithecial development in *Ophiostoma piliferum*. *Mycologia* 87: 857–863.
3. Nerya O, Vaya J, Musa R, Izrael S, Ben-Arie R, Tamir S (2003) Glabrene and isoliquiritigenin as tyrosinase inhibitors from licorice roots. *J Agr Food Chem* 51: 1201–1207.
4. Olivares C, Solano F (2009) New insights into the active site structure and catalytic mechanism of tyrosinase and its related proteins. *Pigm Cell Res* 22: 750–760.
5. Passi S, Nazzaroporro M (1981) Molecular-basis of substrate and inhibitory specificity of tyrosinase—phenolic-compounds. *Brit J Dermatol* 104: 659–665.
6. Chen QX, Liu XD, Huang H (2003) Inactivation kinetics of mushroom tyrosinase in the dimethyl sulfoxide solution. *Biochemistry-Moscow* 68: 644–649. PMID: [12943509](#)
7. Ito S, Wakamatsu K, Ozeki H (2000) Chemical analysis of melanins and its application to the study of the regulation of melanogenesis. *Pigm Cell Res* 13: 103–109.
8. Kumar CM, Sathisha UV, Dharmesh S, Rao AGA, Singh SA (2011) Interaction of sesamol (3,4-methylenedioxyphenol) with tyrosinase and its effect on melanin synthesis (vol 93, pg 562, 2011). *Biochimie* 93: 969–969.
9. Demirkiran O, Sabudak T, Ozturk M, Topcu G (2013) Antioxidant and Tyrosinase Inhibitory Activities of Flavonoids from *Trifolium nigrescens* Subsp *petrisavi*. *J Agr Food Chem* 61: 12598–12603.
10. Lin YF, Hu YH, Lin HT, Liu X, Chen YH, Zhang S, et al. (2013) Inhibitory Effects of Propyl Gallate on Tyrosinase and Its Application in Controlling Pericarp Browning of Harvested Longan Fruits. *J Agr Food Chem* 61: 2889–2895.
11. Xu YM, Stokes AH, Roskoski R, Vrana KE (1998) Dopamine, in the presence of tyrosinase, covalently modifies and inactivates tyrosine hydroxylase. *J Neurosci Res* 54: 691–697. PMID: [9843160](#)
12. Fitzpatrick TB, Arndt KA, el-Mofty AM, Pathak MA (1966) Hydroquinone and psoralens in the therapy of hypermelanosis and vitiligo. *Arch Dermatol* 93: 589–600. PMID: [5940924](#)
13. Mishima Y, Hatta S, Ohyama Y, Inazu M (1988) Induction of melanogenesis suppression: cellular pharmacology and mode of differential action. *Pigment Cell Res* 1: 367–374. PMID: [3148920](#)
14. Breathnach AC, Nazzaro-Porro M, Passi S, Zina G (1989) Azelaic acid therapy in disorders of pigmentation. *Clin Dermatol* 7: 106–119. PMID: [2667735](#)
15. Funayama M, Arakawa H, Yamamoto R, Nishino T, Shin T, Murao S (1995) Effects of alpha- and beta-arbutin on activity of tyrosinases from mushroom and mouse melanoma. *Biosci Biotechnol Biochem* 59: 143–144. PMID: [7765966](#)
16. Parvez S, Kang M, Chung HS, Cho C, Hong MC, Shin MK, et al. (2006) Survey and mechanism of skin depigmenting and lightening agents. *Phytother Res* 20: 921–934. PMID: [16841367](#)
17. Curto EV, Kwong C, Hermersdorfer H, Glatt H, Santis C, Virador V, et al. (1999) Inhibitors of mammalian melanocyte tyrosinase: in vitro comparisons of alkyl esters of gentisic acid with other putative inhibitors. *Biochem Pharmacol* 57: 663–672. PMID: [10037452](#)
18. Hermanns JF, Pierard-Franchimont C, Pierard GE (2000) Skin colour assessment in safety testing of cosmetics. An overview. *Int J Cosmet Sci* 22: 67–71. doi: [10.1046/j.1467-2494.2000.00021.x](#) PMID: [18503462](#)
19. Goto M, Sato-Matsumura KC, Sawamura D, Yokota K, Nakamura H, Shimizu H (2004) Tyrosinase gene analysis in Japanese patients with oculocutaneous albinism. *J Dermatol Sci* 35: 215–220. PMID: [15381243](#)
20. Kim YM, Yun J, Lee CK, Lee H, Min KR, Kim Y (2002) Oxyresveratrol and hydroxystilbene compounds—Inhibitory effect on tyrosinase and mechanism of action. *J Biol Chem* 277: 16340–16344. PMID: [11864987](#)
21. Chen QX, Ke LN, Song KK, Huang H, Liu XD (2004) Inhibitory effects of hexylresorcinol and dodecylresorcinol on mushroom (*Agaricus bisporus*) tyrosinase. *Protein J* 23: 135–141. PMID: [15106879](#)
22. Solomon EI, Sundaram UM, Machonkin TE (1996) Multicopper oxidases and oxygenases. *Chem Rev* 96: 2563–2605. PMID: [11848837](#)
23. Zhang XD, Hu X, Hou AJ, Wang HY (2009) Inhibitory Effect of 2,4,2',4'-Tetrahydroxy-3-(3-methyl-2-butenyl)-chalcone on Tyrosinase Activity and Melanin Biosynthesis. *Biol Pharm Bull* 32: 86–90. PMID: [19122286](#)
24. Park KH, Lee JR, Hahn HS, Kim YH, Bae CD, Yang JM, et al. (2006) Inhibitory effect of ammonium tetrathiotungstate on tyrosinase and its kinetic mechanism. *Chem Pharm Bull* 54: 1266–1270. PMID: [16946532](#)

25. Reish O, Townsend D, Berry SA, Tsai MY, King RA (1995) Tyrosinase inhibition due to interaction of homocyst(e)ine with copper: the mechanism for reversible hypopigmentation in homocystinuria due to cystathionine beta-synthase deficiency. *Am J Hum Genet* 57: 127–132. PMID: [7611281](#)
26. Hu GQ, Hou LL, Xie SQ, Huang WL (2008) Design, synthesis and antitumor activity of asymmetric bis (s-triazole Schiff-base)s bearing functionalized side-chain. *Chinese J Chem* 26: 1145–1149.
27. Sun XH, Tao Y, Liu YF, Chen B, Jia YQ, Yang JW, et al. (2008) Synthesis and biological activities of alkyl substituted triazolethione Schiff base. *Chinese J Chem* 26: 1133–1136.
28. Clare BW, Scozzafava A, Supuran CT (2001) Protease inhibitors: Synthesis of a series of bacterial collagenase inhibitors of the sulfonyl amino acyl hydroxamate type. *J Med Chem* 44: 2253–2258. PMID: [11405662](#)
29. Makawana JA, Sangani CB, Lin L, Zhu H-L (2014) Schiff's base derivatives bearing nitroimidazole and quinoline nuclei: New class of anticancer agents and potential EGFR tyrosine kinase inhibitors. *Bioorg Med Chem Lett* 24: 1734–1736. doi: [10.1016/j.bmcl.2014.02.041](#) PMID: [24630412](#)
30. Chen L-H, Hu Y-H, Song W, Song K-K, Liu X, Jia YL, et al. (2012) Synthesis and Antityrosinase Mechanism of Benzaldehyde Thiosemicarbazones: Novel Tyrosinase Inhibitors. *J Agr Food Chem* 60: 1542–1547.
31. Jimenez M, Chazarra S, Escribano J, Cabanes J, Garcia-Carmona F (2001) Competitive inhibition of mushroom tyrosinase by 4-substituted benzaldehydes. *J Agr Food Chem* 49: 4060–4063.
32. Li Z-C, Chen L-H, Yu X-J, Hu Y-H, Song K-K, Zhou X-W, et al. (2010) Inhibition Kinetics of Chlorobenzaldehyde Thiosemicarbazones on Mushroom Tyrosinase. *J Agr Food Chem* 58: 12537–12540.
33. Chen XX, Shi Y, Chai WM, Feng HL, Zhuang JX, Chen QX (2014) Condensed tannins from *Ficus virens* as tyrosinase inhibitors: structure, inhibitory activity and molecular mechanism. *PLoS One* 9: e91809. doi: [10.1371/journal.pone.0091809](#) PMID: [24637701](#)
34. Lin M, Ke L-N, Han P, Qiu L, Chen Q-X, Lin HT, et al. (2010) Inhibitory effects of p-alkylbenzoic acids on the activity of polyphenol oxidase from potato (*Solanum tuberosum*). *Food Chem* 119: 660–663.
35. Kim D, Park J, Kim J, Han C, Yoon J, Kim N, et al. (2006) Flavonoids as mushroom tyrosinase inhibitors: A fluorescence quenching study. *J Agr Food Chem* 54: 935–941.
36. Chen XX, Zhang J, Chai WM, Feng HL, Xiang ZH, Shen DY, et al. (2013) Reversible and competitive inhibitory kinetics of amoxicillin on mushroom tyrosinase. *Int J Biol Macromol* 62: 726–733. doi: [10.1016/j.ijbiomac.2013.09.052](#) PMID: [24099941](#)
37. Yang CY, Yang Y, Aisa HA, Xin XL, Ma HR, Yili A, et al. (2012) Bioassay-guided isolation of antioxidants from *Astragalus altaicus* by combination of chromatographic techniques. *J Sep Sci* 35: 977–983. doi: [10.1002/jssc.201101104](#) PMID: [22589158](#)
38. Zhu LF, Xu M, Zhu HT, Wang D, Yang SX, Yang CR, et al. (2012) New Flavan-3-ol Dimer from Green Tea Produced from *Camellia taliensis* in the Ai-Lao Mountains of Southwest China. *J Agr Food Chem* 60: 12170–12176.
39. Chiari ME, Vera DMA, Palacios SM, Carpinella MC (2011) Tyrosinase inhibitory activity of a 6-isoprenoid-substituted flavanone isolated from *Dalea elegans*. *Bioorg Med Chem Lett* 19: 3474–3482.
40. Matoba Y, Kumagai T, Yamamoto A, Yoshitsu H, Sugiyama M (2006) Crystallographic evidence that the dinuclear copper center of tyrosinase is flexible during catalysis. *J Biol Chem* 281: 8981–8990. PMID: [16436386](#)
41. Crony JC, Jameson DM, Learmonth RP (2001) Fluorescence spectroscopy in biochemistry: teaching basic principles with visual demonstrations. *Biochem Mol Biol Edu* 29: 60–65.
42. Eftink MR, Ghiron CA (1981) Fluorescence quenching studies with proteins. *Anal Biochem* 114: 199–227. PMID: [7030122](#)
43. Kim YJ, Uyama H (2005) Tyrosinase inhibitors from natural and synthetic sources: structure, inhibition mechanism and perspective for the future. *Cell Mol Life Sci* 62: 1707–1723. PMID: [15968468](#)
44. Shin NH, Ryu SY, Choi EJ, Kang SH, Chang IM, Min KR, et al. (1998) Oxyresveratrol as the potent inhibitor on dopa oxidase activity of mushroom tyrosinase. *Biochem Bioph Res Co* 243: 801–803.
45. Cui Y, Liang G, Hu YH, Shi Y, Cai YX, Gao HJ, et al. (2015) Alpha-Substituted Derivatives of Cinnamaldehyde as Tyrosinase Inhibitors: Inhibitory Mechanism and Molecular Analysis. *J Agr Food Chem* 63: 716–722.
46. Hamidian H (2013) Synthesis of novel compounds as new potent tyrosinase inhibitors. *Biomed Res Int* 2013: 207181. doi: [10.1155/2013/207181](#) PMID: [24260737](#)
47. Akhtar MN, Sakeh NM, Zareen S, Gul S, Lo KM, Ul-Haq Z, et al. (2015) Design and synthesis of chalcone derivatives as potent tyrosinase inhibitors and their structural activity relationship. *J Mol Struct* 1085: 97–103
48. Hu YH, Liu X, Jia YL, Guo YJ, Wang Q, Qin Wang, et al. (2014) Inhibitory kinetics of chlorocinnamic acids on mushroom tyrosinase. *J Biosci Bioeng* 117: 142–146. doi: [10.1016/j.jbiosc.2013.07.002](#) PMID: [23958639](#)
